# Supplementary material
Source: HighWire-hosted journal article supplement (https://spcare.bmj.com/content/10/1/14)
Supplement: inline-supplementary-material-2 [file inline-supplementary-material-2.pdf]

**Supplementary Table 1: Assessment of risk of bias (high, low or unclear) - Cochrane Risk of Bias Tool <sup>14</sup>**

| Study               | Selection bias             |                        | Performance bias                      | Detection bias                 | Attrition bias          | Reporting bias      |
|---------------------|----------------------------|------------------------|---------------------------------------|--------------------------------|-------------------------|---------------------|
|                     | Random sequence generation | Allocation concealment | Blinding of participant and personnel | Blinding of outcome assessment | Incomplete outcome data | Selective reporting |
| Lichtman 2018       | Low                        | Low                    | Low                                   | Low                            | Low                     | Low                 |
| Fallon 2017 Study-1 | Low                        | Low                    | Low                                   | Low                            | Low                     | Low                 |
| Fallon 2017 Study-2 | Low                        | Low                    | Low                                   | Low                            | Low                     | Low                 |
| Lynch 2014          | Low                        | Low                    | Low                                   | Low                            | Low                     | Low                 |
| Portenoy 2012       | Low                        | Low                    | Low                                   | Low                            | Low                     | Low                 |
| Johnson 2010        | Low                        | Low                    | Low                                   | Low                            | Low                     | Low                 |
